# Myelin water imaging depends on white matter fiber orientation in the human brain

Christoph Birkel<sup>1,2,3</sup>, Jonathan Doucette<sup>1,4</sup>, Michael Fan<sup>1,5</sup>, Eneidino Hernandez-Torres<sup>1,6</sup>, and Alexander Rauscher<sup>1,4,7</sup>

<sup>1</sup>UBC MRI Research Centre, University of British Columbia; <sup>2</sup>Department of Neuroradiology, Medical University of Innsbruck; <sup>3</sup>Department of Neurology, Medical University of Graz; <sup>4</sup>Department of Physics and Astronomy, University of British Columbia; <sup>5</sup>Texas Oncology; <sup>6</sup>Department of Medicine (Division of Neurology), University of British Columbia; <sup>7</sup>Department of Pediatrics (Division of Neurology), University of British Columbia

This manuscript is submitted to Magnetic Resonance in Medicine.

**The multiexponential  $T_2$  decay of the magnetic resonance imaging (MRI) signal from cerebral white matter can be separated into short components sensitive to myelin water and long components related to intra- and extracellular water. In this study we investigated to what degree the myelin water fraction (MWF) depends on the angle between white matter fibers and the main magnetic field. Maps of MWF were acquired using multi echo CPMG and GRASE sequences. The CPMG sequence was acquired with a TR of 1073 ms, 1500 ms and 2000 ms. The fiber orientation was mapped with diffusion tensor imaging. By angle-wise pooling the voxels across the brain's white matter, an orientation dependent MWF curve was generated. We found that MWF varied between 25% and 35% across different fiber orientations. The orientation dependency of the MWF is characterized by a dipole-dipole interaction model. Furthermore, the selection of the TR influences the orientation dependent and global white matter MWF. White matter fiber orientation induces a strong systematic bias on the estimation of MWF. This finding has important implications for future research and the interpretation of MWI results in previously published studies.**

myelin water imaging | fiber orientation | white matter | magic angle | brain | quantitative MRI

## Introduction

Myelin is a lipid bilayer membrane wrapped around the axon, protecting it from mechanical and chemical damage (1, 2) and facilitating fast saltatory signal conduction (3, 4). The space between the myelin bilayers is filled with water which is commonly referred to as myelin water. Due to reduced mobility within this confined space, myelin water has a magnetic resonance  $T_2$  relaxation time of around 10 ms at a field strength of 3T. In contrast, the  $T_2$  relaxation time of the intra- and extracellular water is in the range of 30 ms to 60 ms, and the cerebrospinal fluid (CSF) has a  $T_2$  relaxation time of more than one second (5, 6). The resulting multi-exponential  $T_2$  signal decay of a white matter voxel can be measured using a multi-echo spin echo scan and decomposed into its individual components, resulting in a  $T_2$  spectrum (7). The area under the short  $T_2$  components, referred to as the myelin water peak, divided by the total area is defined as the myelin water fraction (MWF). A strong correlation between the MWF and independent measures of myelin has been demonstrated in various post-mortem studies (8–10). Over the past two decades, myelin water imaging (MWI) has been applied to mild traumatic brain injury (11), aging (12), spinal cord injury (13), neonates (14), and multiple sclerosis (15–18), among others. The human brain's white matter is highly anisotropic. This circumstance is widely exploited in diffusion tensor imaging (DTI), which allows to map the brain's complex fiber architecture (19). The orientation of white matter

fibers with respect to the main magnetic field  $B_0$  also affects the magnitude and phase of the complex MRI signal and a wide range of quantitative MRI parameters. Strong orientation effects have been reported for  $R_2^*$  relaxation (20–25), gradient echo phase (21, 24, 26), quantitative susceptibility maps (QSM) (27). A weak orientation effect also exists for  $T_1$  relaxation (28, 29). Moreover, due to anisotropy of the cerebral vascular architecture, dynamic susceptibility contrast (DSC) perfusion measurements conducted with both gradient echo (30) and spin echo sequences (31) show an orientation dependent behaviour. The orientation dependency of the gradient echo signal of white matter is extensively studied and is ascribed mainly to the anisotropy of the magnetic susceptibility caused by the myelinated nerve fibers (24, 25, 32, 33). The observation that the spin echo DSC signal (31) and white matter  $R_2$  (25) also depend on the fiber orientation suggests that MWI is potentially affected as well. Therefore, we investigated whether and to what degree the MWF depends on the angle between the white matter fiber tracts and the main magnetic field  $B_0$ . In the present study, we acquired MWI using a gradient and spin echo (GRASE) sequence (34), which is widely used in literature, and the Carr-Purcell-Meiboom-Gill (CPMG) sequence, which is the gold standard. The CPMG sequence was further acquired at various repetition times (TR). We show that the MWF strongly depends on white matter fiber orientation, independent of MRI sequence.

## Methods

Eight healthy volunteers (3 female, 5 male) with a mean age of 26 years (age range = 21 – 33 years) and without any history of neurological disorder participated in this study, which was approved by the University of British Columbia Clinical Research Ethics Board. All volunteers gave written informed consent. MR imaging was performed on a 3 T MR system (Ingenia Elition, Philips Medical Systems, Best, The Netherlands) using a 32-channel SENSE head coil.

**MRI acquisition.** A 3D  $T_1$  weighted sequence with echo time (TE) = 4.9 ms, TR = 9.8 ms, flip angle = 8°, a resolution of 0.8 x 0.8 x 0.8 mm<sup>3</sup>, a compressed SENSE (CS) factor of 3.6 and acquisition time of 5:50 min was acquired for anatomical overview. CS is a combination of compressed sensing (35, 36) and SENSE (37). For the calculation of fiber orientation a DTI sequence with TE = 60 ms, TR = 4111 ms, b-value = 700 s/mm<sup>2</sup>, 60 diffusion directions, a resolution of 2.3 x 2.3 x 2.4 mm<sup>3</sup>, multi band factor 2 (38), SENSE factor 2.1 and

\*Corresponding author Christoph Birkel, PhD. E-mail: christoph.birkel@ubc.ca

acquisition time of 4:19 min was acquired. MWI was performed using following sequences: (I) a GRASE sequence with TR = 1073 ms, SENSE of 2.5, three gradient echos per spin echo and acquisition time of 11:29 min. (II) a CPMG sequences with TR = 1073 ms and acquisition time of 09:43 min. (III) a CPMG sequence with TR = 1500 ms and acquisition time of 13:33 min. (IV) a CPMG sequence with TR = 2000 ms and acquisition time of 18:04 min. All CPMG sequences were accelerated with a CS factor of 7 and all MWI sequences had 48 echoes with the first echo at TE = 8 ms,  $\Delta$ TE = 8 ms, and a spatial resolution of 0.96 x 0.96 x 2.5 mm<sup>3</sup>. 3D T<sub>1</sub>, DTI and MWI sequences were acquired in axial orientation without angulation. Due to the long data acquisition times, not all sequences were acquired in all volunteers.

**Image analysis.** DTI data were analysed with the FMRIB Software Library (FSL v5.0.9)(39–41). Distortions induced by eddy currents and head motion were corrected by FSL’s eddy\_correct. FSL DTIFIT was used to calculate the diffusion tensor model and thus the eigenvalues and eigenvectors. For MWI analysis, the T<sub>2</sub> distributions were computed using a regularized non-negative least squares (NNLS) algorithm with stimulated echo correction and a T<sub>2</sub> range of 8 ms to 2.0 s (6, 34, 42, 43). The multi-exponential signal decay is expressed as a T<sub>2</sub> distribution where the myelin water component is defined as the T<sub>2</sub> times of the distribution between 8 ms and 25 ms. The intra- and extra-cellular water component is defined as the T<sub>2</sub> times above 25 ms. The cut-off between the two water pools was set to 25 ms, which was based on the measured T<sub>2</sub> distributions. The MWF was calculated as the ratio of the myelin water T<sub>2</sub> components to all T<sub>2</sub> components. The T<sub>1</sub> and DTI data was linearly registered to the MWI using FLIRT. FSL’s vecreg was used to register the first eigenvector to the MWI space. The fiber orientation was calculated from the angle between the first eigenvector to the direction of the main magnetic field B<sub>0</sub> (21). Brain extraction was performed using FSL’s brain extraction tool (bet) and FSL’s FAST was used to generate a white matter mask, which was eroded with a 3 × 3 × 3 kernel. The MWF, myelin water T<sub>2</sub> and intra- and extra-cellular water T<sub>2</sub> were computed as a function of local fiber orientation  $\theta$ . The fiber orientations were divided into 18 intervals of 5° between 0° (parallel to B<sub>0</sub>) and 90° (perpendicular to B<sub>0</sub>). To compute MWF( $\theta$ ), voxels from across the entire white matter were pooled for each angle interval, in order to suppress the influence of tract specific differences in MWF.

**Fit of the dipole interaction model.** Highly ordered biological tissues give rise to orientation dependent T<sub>2</sub> signal via dipole-dipole interaction (44). Therefore, a dipole-dipole interaction model (25) according to

$$MWF(\theta) = c_0 + c_1 \cdot (3 \cos^2(\theta) - 1)^2 \quad [1]$$

was fitted to the MWF data.  $c_0$  represents the orientation independent part of the MWF,  $c_1$  a parameter scaling the orientation dependent part of the MWF and  $\theta$  is the angle between white matter fibers and the main magnetic field B<sub>0</sub>. Fitting was performed using MATLAB’s nonlinear least squares algorithm.

**Statistical analysis.** All parameters were tested for normal distribution using the Shapiro-Wilk test. A t-test was used to

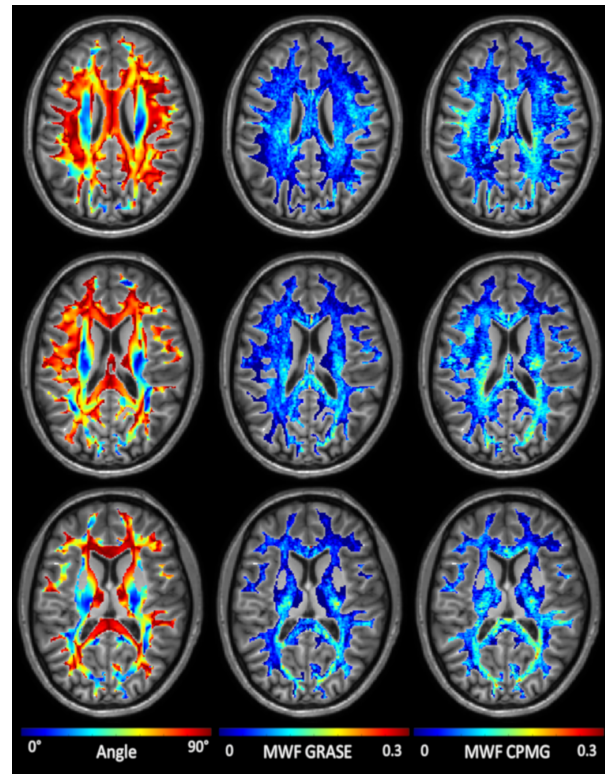

**Fig. 1.** Representative fiber angle and MWF maps, acquired using a CPMG and GRASE sequence, of a single subject.

test significance of differences between GRASE and CPMG. To test whether the fibre angle and TR had a significant effect on MWF and T<sub>2</sub>, an ANOVA was used. All statistical analyses were performed using R (version 3.5.1, The R Foundation for Statistical Computing).

## Results

Representative maps of the angle between white matter fibers and B<sub>0</sub>, and the corresponding MWF maps are shown in Figure 1. Overall, the GRASE and CPMG sequence provide comparable results, although using a CPMG sequence resulted in higher MWF.

The relationship between MWF, myelin water T<sub>2</sub> and intra- and extra-cellular water T<sub>2</sub> and the white matter fiber orientation, is shown in Figure 2. In general, the MWF decreased with increasing fiber angles and reached a minimum between 50° and 60°, followed by an increase towards angles of 90°. The solid red line represents the fit of the dipole-dipole interaction model to the measured MWF data (Figure 2A). The MWF varied by approximately 35% for the GRASE sequence, and by approximately 22% for the CPMG sequence, across different fiber orientations. Using a GRASE sequence resulted in a stronger MWF orientation dependency, as evident by a larger  $c_1$  coefficient (see Table 1). A summary of all fit parameters is given in Table 1. Myelin water T<sub>2</sub> (Figure 2B) and intra- and extra-cellular water T<sub>2</sub> (Figure 2C) increased with increasing fiber angle up to a maximum between 15° to 25° followed by a decrease. Between GRASE and CPMG, there was a significant difference in the orientation dependency of

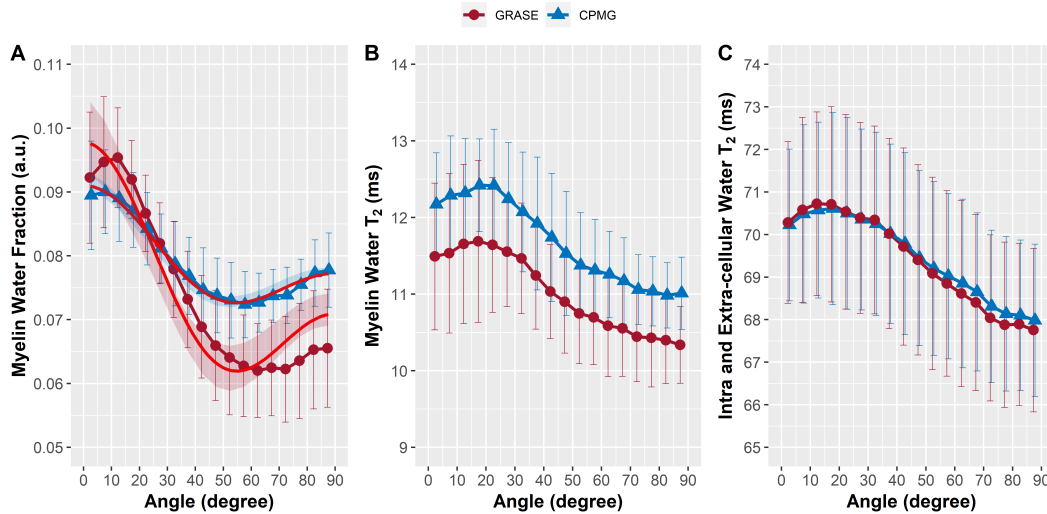

**Fig. 2.** Myelin water fraction (MWF) (A), myelin water  $T_2$  (B) and intra- and extra-cellular water  $T_2$  (C) as function of fiber orientation acquired using a GRASE (red) and CPMG (blue) sequence, both with TR = 1073 ms. The solid red lines represent the fits of the dipole-dipole interaction model to the MWF data. The minimum of the orientation dependent MWF was between  $50^\circ$  and  $60^\circ$ , which agrees well with the minimum of the dipole-dipole model at  $54.7^\circ$ . The shaded area represents the 95% confidence interval.

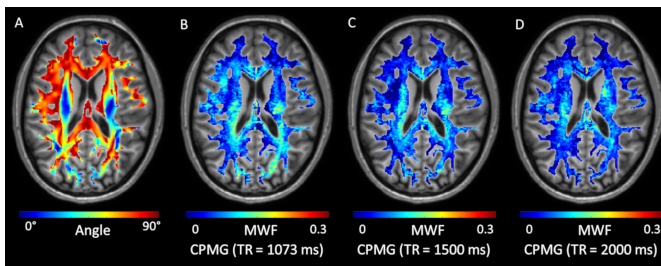

**Fig. 3.** Representative fiber angle and MWF maps acquired using a CPMG sequence with TR = 1073 ms, 1500 ms and 2000 ms. Overall, MWF decreases with increasing TR.

the MWF ( $p = 0.002$ ), the myelin water  $T_2$  ( $p < 0.001$ ) and no significant difference in the orientation dependency of the intra- and extra-cellular water  $T_2$  ( $p = 0.79$ ).

**Effect of TR.** With increasing TR from 1073 ms to 1500 ms and 2000 ms, the orientation dependent MWF decreased across all regions, as shown in Figure 3. In general the TR of the CPMG sequence had a significant influence on MWF ( $p < 0.001$ ), myelin water  $T_2$  ( $p < 0.001$ ) and intra- and extra-cellular water  $T_2$  ( $p < 0.001$ ) as shown in Figure 4. The shape of the orientation dependent MWF, myelin water  $T_2$  and intra- and extra-cellular water  $T_2$  was similar but shifted with increasing TR. The effect of TR is further evident by plotting the global white matter mean of the MWF (Figure 5A), myelin water  $T_2$  (Figure 5B) and intra- and extra-cellular water  $T_2$  (Figure 5C). For example the MWF decreased by 21.5% from 0.079 at TR = 1073 ms to 0.062 at TR = 2000 ms ( $p = 0.006$ ) as shown in Figure 5A.

## Discussion

We demonstrated that the measurement of MWF is considerably influenced by the angle between white matter fiber tracts and the main magnetic field. Furthermore, we showed

**Table 1. Summary of the dipole-dipole fits to the measured orientation dependent MWF.  $c_0$  represents the orientation independent part of the MWF.  $c_1$  is a constant scaling the orientation dependent part of the MWF.**

| Sequence | TR (ms) | $c_0$ | 95% CI        | $c_1$ | 95% CI        | SE     |
|----------|---------|-------|---------------|-------|---------------|--------|
| GRASE    | 1073    | 0.062 | (0.060-0.065) | 0.010 | (0.008-0.011) | 0.0049 |
| CPMG     | 1073    | 0.060 | (0.059-0.062) | 0.005 | (0.005-0.006) | 0.0012 |
| CPMG     | 1500    | 0.065 | (0.063-0.067) | 0.004 | (0.003-0.005) | 0.0018 |
| CPMG     | 2000    | 0.058 | (0.056-0.060) | 0.003 | (0.001-0.004) | 0.0015 |

that the TR of the sequence has an impact on estimating the MWF. Orientation effects of the transverse relaxation have been mainly ascribed to dipole-dipole interaction and to magnetic susceptibility effects. Orientation dependency of  $T_2$  has been described in vivo in highly ordered tissues, such as cartilage and tendons (45, 46). Such structures give high  $T_2$  signal when they are oriented at angles where the term  $3 \cos^2(\theta) - 1$  describing the z-component of the dipole field is zero. Another cause of orientation effects is the magnetic susceptibility of tissue, which has a strong influence on phase and magnitude of the gradient echo signal. While the orientation dependency of white matter  $R_2^*$  has been studied extensively (20–22, 24, 25, 47), the effect of tissue orientation on  $R_2$  in the brain has been considered weak, with the notable exception of spin echo DSC MRI, where a paramagnetic contrast agent amplifies the magnetic field inhomogeneities around blood vessels. Diffusion in the vicinity of the anisotropic white matter vasculature gives rise to a strong orientation dependency in the measurements of cerebral blood flow and volume (31). Of course, such orientation effect is also present and much stronger in gradient echo DSC (30), where the signal is dominated by static dephasing. Oh and colleagues reported a weak orientation dependency of  $R_2$  in ex vivo formalin fixed white matter that is best described by dipole-dipole interaction (25). Based on their finding, the authors suggested that MWF should also weakly depend on fiber orientation. However, the angle effects in their  $R_2$  data were small, which could be a consequence of fixation induced cross-linking, which

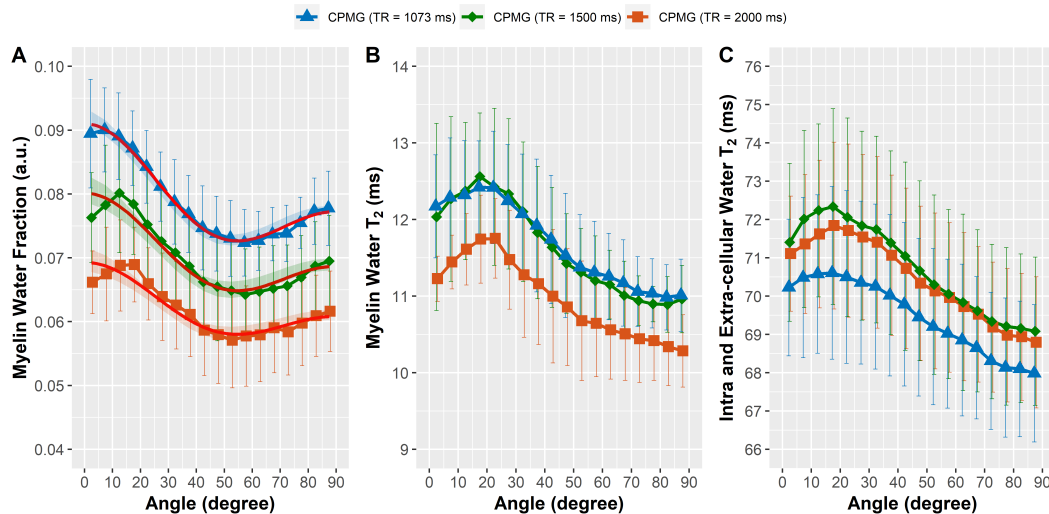

**Fig. 4.** Myelin water fraction (MWF) (A), myelin water  $T_2$  (B) and intra- and extra-cellular water  $T_2$  (C) as function of fiber orientation acquired using a CPMG sequence with a TR of 1073 ms (blue), 1500 ms (green) and 2000 ms (orange). The solid red line represents the fit of the dipole-dipole interaction model to MWF data. The minimum of the orientation dependent MWF was between  $50^\circ$  and  $60^\circ$ , which agrees well with the minimum of the dipole-dipole model at  $54.7^\circ$ . The shaded areas represent the 95% confidence intervals.

reduces tissue anisotropy at length scales that are relevant to  $T_2$  relaxation. Furthermore, with the decreased  $T_2$  relaxation times due to tissue fixation (48) and due to the high field strength of 7 T, the shortest echo time of 9 ms may be too long to capture orientation effects under these conditions. In the present work in vivo at 3 T and with 8 ms echo spacing, we saw that MWF was approximately 30% lower at angles between  $50^\circ$  and  $60^\circ$  compared to tissue parallel to  $B_0$ . All MWF measurements followed this pattern, with a minimum near the magic angle of  $54.7^\circ$ . Fitting the dipole-dipole model to our data resulted in good fit quality, in particular for the CPMG data. Note that there is almost perfect overlap between the average CPMG  $MWF(\theta)$  and the dipole-dipole model which is reflected in the low standard error of the regression. The orientation behaviours of GRASE and CPMG were different, in particular at larger angles. The attenuated recovery of the MWF in GRASE at angles above  $54.7^\circ$  compared to the more pronounced recovery in the CPMG may be due to some  $R_2^*$  weighting of the GRASE sequence, which may lead to a reduction of the signal due to field inhomogeneities created by the myelinated axons at larger angles. The dependency of MWF on TR could be explained by the different  $T_1$  relaxation times of myelin water and the intra- and extracellular water. The overall  $T_1$  relaxation of white matter at 3 T is around 1100 ms (49, 50), whereas  $T_1$  of myelin water is around 200 ms (51–53). Therefore, myelin water is almost fully relaxed even at the shortest TR used in the present study, whereas the intra- and extracellular water signal is attenuated and increases with increasing TR. As a result, the MWF decreases with increasing TR. Schyboll and colleagues showed a small orientation dependency in both  $T_1$  and water content measurements, of 2.5% and 0.8%, respectively (28). Interestingly, the shape of the water content curve mirrors the MWF curve in our study. In a very recent paper, the same authors showed that the susceptibility effects of the myelin sheath only cause a very weak orientation dependency in  $T_1$  of about  $0.4 \times 10^{-4} Hz$  between parallel fibers and fibers at the magic angle (29).

The good agreement between  $MWF(\theta)$  and the dipole-dipole model and previous observations in other ordered tissues that are also described by dipole-dipole interaction suggest that this interaction is a main cause of orientation effects in MWF. The question is how the dipole-dipole interaction translates to the observed  $MWF(\theta)$ . A direct effect of dipole-dipole interaction in the myelin water pool itself would result in the reverse behaviour, with a maximum at the magic angle instead of the observed minimum. Henkelman et al. (46) argued that the alignment of water molecules with filaments but not with cylindrical or plane surfaces would cause dipole-dipole coupling effects in  $T_2$ . Such effect is seen in cartilage, where the collagen fibers lead to a two to threefold increase in  $T_2$  signal at the magic angle (54). Filaments are also present within the axon as microtubule and neurofilaments (55), which may be able to produce a magic angle effect in the  $T_2$  signal of white matter. This interpretation is in agreement with the reduced orientation dependency of  $T_2$  in ex vivo formalin fixed tissue (25), where cross-linking reduces the anisotropy. Additional controlled experiments in tissue samples and animal models are needed to fully explain the origins of orientation dependency in MWF.

This study has limitations. We only investigated TR up to 2000 ms, which is approximately two times the  $T_1$  of the long  $T_1$  component. The shortest TR of 1073 ms, on the other hand, was defined by the specific absorption rate of the scan. With the required anatomical and DTI scans and the comparison with the GRASE approach at 1073 ms, the total scan protocol took around 75 minutes. Therefore, the present study is not able to answer the question how MWF behaves in the absence of  $T_1$  weighting. A comprehensive study that explores the effects of TR would require several long scans with TRs of up to 5000 ms, where  $T_1$  weighting of the intra- and extra-cellular water is reduced to less than 2%. Such study may be feasible with reduced brain coverage and lower spatial resolution, which both make image registration more challenging, and by not scanning every TR in every participant.

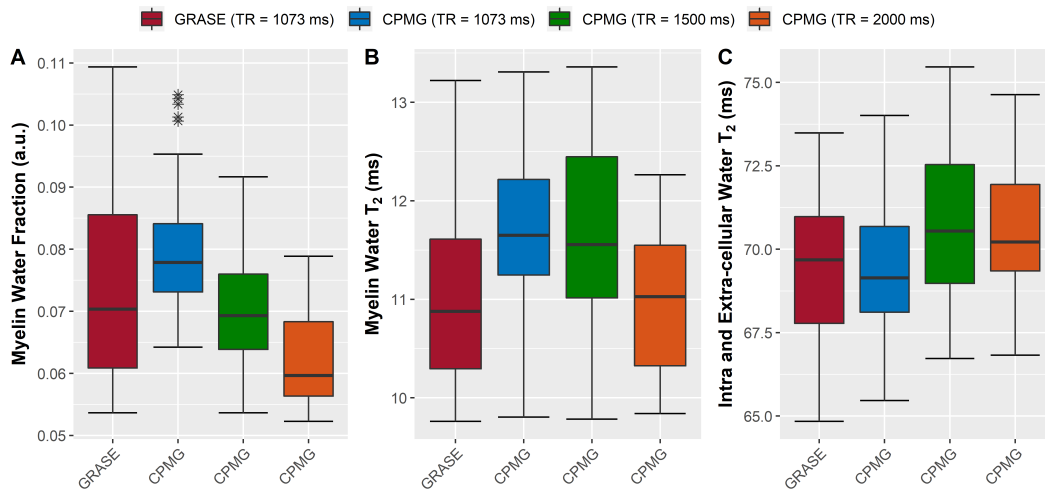

**Fig. 5.** Global white matter MWF (A), myelin water  $T_2$  (B) and intra- and extra-cellular water  $T_2$  (C). TR has a significant impact on MWF ( $p < 0.001$ ), myelin water  $T_2$  ( $p < 0.001$ ) and intra- and extra-cellular water  $T_2$  ( $p < 0.001$ ).

While the model of dipole-dipole interaction fits the data well, additional effects may play a role in the observed MWF behaviour. The approach of using DTI to determine the fiber orientation and pooling voxels according to their local fiber orientation is widely used and accepted (20, 21, 24, 30, 56). Since for each angle interval voxels are pooled from across the entire brain, potential tract specific differences in MWF get averaged out. Moreover, MWF( $\theta$ ) of all subjects followed this pattern, independently of individual differences in head orientation or white matter anatomy. Finally, if anatomical differences played a major role, MWF( $\theta$ ) would exhibit an irregular pattern instead of following a smooth and simple trigonometric function with only one angle dependent parameter.

Our findings have several consequences for the interpretation of past results and for future research. The orientation dependency of MWF might mask longitudinal changes in MWF or changes between cohorts, if whole WM averages are investigated. A corresponding effect was observed in white matter  $R_2^*$ , where only an orientation dependent analysis was able to reveal group differences (47, 56). Kor et al. modelled the  $R_2^*$  relaxation as a function of white matter orientation, myelin, and iron content and were able to compute whole white matter myelin and iron content (47). This approach assumed that the effects of iron are orientation independent and that only the myelin sheath gives rise to an orientation dependent  $R_2^*$ . Since iron contributes to more than 25% of the apparent MWF (57), an orientation dependent analysis accompanied by a model that includes the effects of both myelin and iron may shed further light on the orientation dependency of MWF.

Our findings suggest that, when comparing MWF of individual subjects to a myelin water atlas (58, 59), these atlases have to be updated with DTI data. In particular, fiber tracts at angles between  $10^\circ$  and  $40^\circ$ , where MWI is most sensitive to changes in tissue orientation, may exhibit paradoxical results if their orientation differs from the average orientation of the tract in the atlas. A difference in angle by  $10^\circ$ , for example, would result in a relative difference in MWF by approximately 5% to 7%, which is similar to the reduction in MWF in the

normal appearing white matter in multiple sclerosis over five years (18). Similarly, if regions of interest are analyzed in a longitudinal study, participants should be scanned at the same head orientation. However, the fact that the dipole-dipole model provides a good fit to the experimental data suggests that an orientation correction based on that model and on an accompanying DTI scan may be feasible. Such correction would also be essential for the comparison of MWF between different fiber tracts.

In conclusion, our study revealed that the MWF depends on white matter fiber orientation. With increasing TR, the overall MWF decreased, while the orientation dependency persisted.

## Acknowledgments

This study was funded by the Austrian Science Fund (FWF) project number J 4038, by the National MS Society (RG 1507 05301), by the Natural Sciences and Engineering Research Council of Canada, Grant/Award Number 016-05371 and the Canadian Institutes of Health Research, Grant Number RN382474-418628. A.R. is supported by Canada Research Chairs 950-230363.

## References

- Duncan ID, Marik RL, Broman AT, Heidari M (2017) Thin myelin sheaths as the hallmark of remyelination persist over time and preserve axon function. *Proceedings of the National Academy of Sciences of the United States of America* 114(45):E9685–E9691.
- Nave KA, Trapp BD (2008) Axon-glia signaling and the glial support of axon function. *Annual review of neuroscience* 31(1):535–61.
- Dutta DJ, et al. (2018) Regulation of myelin structure and conduction velocity by perinodal astrocytes. *Proceedings of the National Academy of Sciences* 115(46):11832–11837.
- Zalc B, Goujet D, Colman D (2008) The origin of the myelination program in vertebrates. *Current biology : CB* 18(12):R511–2.
- MacKay A, et al. (1994) In vivo visualization of myelin water in brain by magnetic resonance. *Magnetic resonance in medicine* 31(6):673–7.
- Whittall KP, et al. (1997) In vivo measurement of T2 distributions and water contents in normal human brain. *Magnetic resonance in medicine : official journal of the Society of Magnetic Resonance in Medicine / Society of Magnetic Resonance in Medicine* 37(1):34–43.
- Whittall KP, et al. (1997) In vivo measurement of T2 distributions and water contents in normal human brain. *Magnetic resonance in medicine* 37(1):34–43.
- Chen HSM, Holmes N, Liu J, Tetzlaff W, Kozłowski P (2017) Validating myelin water imaging with transmission electron microscopy in a rat spinal cord injury model. *NeuroImage* 153:122–130.

9. Laule C, et al. (2008) Myelin water imaging of multiple sclerosis at 7 T: Correlations with histopathology. *NeuroImage* 40(4):1575–1580.
10. Webb S, Munro CA, Midha R, Stanisz GJ (2003) Is multicomponent T2 a good measure of myelin content in peripheral nerve? *Magnetic resonance in medicine* 49(4):638–45.
11. Wright AD, et al. (2016) Myelin Water Fraction Is Transiently Reduced after a Single Mild Traumatic Brain Injury—A Prospective Cohort Study in Collegiate Hockey Players. *PLoS one* 11(2):e0150215.
12. Faizy TD, et al. (2018) Age-Related Measurements of the Myelin Water Fraction derived from 3D multi-echo GRASE reflect Myelin Content of the Cerebral White Matter. *Scientific reports* 8(1):14991.
13. Kozłowski P, et al. (2008) Characterizing white matter damage in rat spinal cord with quantitative MRI and histology. *Journal of neurotrauma* 25(6):653–76.
14. Weber AM, Zhang Y, Kames C, Rauscher A (2019) Myelin water imaging and R2\* mapping in neonates: Investigating R2\* dependence on myelin and fibre orientation in whole brain white matter. *NMR in biomedicine* p. e4222.
15. Choi JY, et al. (2019) Evaluation of Normal-Appearing White Matter in Multiple Sclerosis Using Direct Visualization of Short Transverse Relaxation Time Component (ViSta) Myelin Water Imaging and Gradient Echo and Spin Echo (GRASE) Myelin Water Imaging. *Journal of Magnetic Resonance Imaging* 49(4):1091–1098.
16. Faizy TD, et al. (2016) Heterogeneity of Multiple Sclerosis Lesions in Multislice Myelin Water Imaging. *PLoS one* 11(3):e0151496.
17. O'Muircheartaigh J, et al. (2019) Quantitative neuroimaging measures of myelin in the healthy brain and in multiple sclerosis. *Human Brain Mapping* 40(7):2104–2116.
18. Vavasour IM, et al. (2018) Global loss of myelin water over 5 years in multiple sclerosis normal-appearing white matter. *Multiple Sclerosis Journal* 24(12):1557–1568.
19. Basser PJ, Jones DK (2002) Diffusion-tensor MRI: theory, experimental design and data analysis - a technical review. *NMR in biomedicine* 15(7-8):456–467.
20. Bender B, Klose U (2010) The in vivo influence of white matter fiber orientation towards B0 on T2\* in the human brain. *NMR in Biomedicine* 23(9):1071–1076.
21. Denk C, Hernandez Torres E, MacKay A, Rauscher A (2011) The influence of white matter fiber orientation on MR signal phase and decay. *NMR in biomedicine* 24(3):246–52.
22. Lee J, et al. (2011) T2\*-based fiber orientation mapping. *NeuroImage* 57(1):225–34.
23. Lee J, et al. (2017) An R2\* model of white matter for fiber orientation and myelin concentration. *NeuroImage* 162(January):269–275.
24. Wharton S, Bowtell R (2012) Fiber orientation-dependent white matter contrast in gradient echo MRI. *Proceedings of the National Academy of Sciences of the United States of America* 109(45):18559–64.
25. Oh SH, Kim YB, Cho ZH, Lee J (2013) Origin of B0 orientation dependent R2\* (=1/T2\*) in white matter. *NeuroImage* 73:71–79.
26. He X, Yablonskiy DA (2009) Biophysical mechanisms of phase contrast in gradient echo MRI. *Proceedings of the National Academy of Sciences of the United States of America* 106(32):13558–63.
27. Liu C (2010) Susceptibility tensor imaging. *Magnetic resonance in medicine : official journal of the Society of Magnetic Resonance in Medicine / Society of Magnetic Resonance in Medicine* 63(6):1471–7.
28. Schyboff F, Jaekel U, Weber B, Neeb H (2018) The impact of fibre orientation on T1-relaxation and apparent tissue water content in white matter. *Magnetic Resonance Materials in Physics, Biology and Medicine* 31(4):501–510.
29. Schyboff F, Jaekel U, Petruccione F, Neeb H (2019) Fibre-orientation dependent R1 (=1/T1) relaxation in the brain: The role of susceptibility induced spin-lattice relaxation in the myelin water compartment. *Journal of Magnetic Resonance* 300:135–141.
30. Hernández-Torres E, et al. (2017) Anisotropic cerebral vascular architecture causes orientation dependency in cerebral blood flow and volume measured with dynamic susceptibility contrast magnetic resonance imaging. *Journal of Cerebral Blood Flow & Metabolism* 37(3):1108–1119.
31. Doucette J, et al. (2019) Rapid solution of the Bloch-Torrey equation in anisotropic tissue: Application to dynamic susceptibility contrast MRI of cerebral white matter. *NeuroImage* 185(October 2018):198–207.
32. Li W, Wu B, Avram AV, Liu C (2012) Magnetic susceptibility anisotropy of human brain in vivo and its molecular underpinnings. *NeuroImage* 59(3):2088–97.
33. Sukstanskii AL, Yablonskiy Da (2014) On the role of neuronal magnetic susceptibility and structure symmetry on gradient echo MR signal formation. *Magnetic resonance in medicine : official journal of the Society of Magnetic Resonance in Medicine / Society of Magnetic Resonance in Medicine* 71(1):345–53.
34. Prasloski T, et al. (2012) Rapid whole cerebrum myelin water imaging using a 3D GRASE sequence. *NeuroImage* 63(1):533–539.
35. Candès EJ, Romberg JK, Tao T (2006) Stable signal recovery from incomplete and inaccurate measurements. *Communications on Pure and Applied Mathematics* 59(8):1207–1223.
36. Lustig M, Donoho D, Pauly JM (2007) Sparse MRI: The application of compressed sensing for rapid MR imaging. *Magnetic Resonance in Medicine* 58(6):1182–1195.
37. Pruessmann KP, Weiger M, Scheidegger MB, Boesiger P (1999) SENSE: sensitivity encoding for fast MRI. *Magnetic resonance in medicine* 42(5):952–62.
38. Moeller S, et al. (2010) Multiband multislice GE-EPI at 7 tesla, with 16-fold acceleration using partial parallel imaging with application to high spatial and temporal whole-brain fMRI. *Magnetic resonance in medicine* 63(5):1144–53.
39. Jenkinson M, Beckmann CF, Behrens TEJ, Woolrich MW, Smith SM (2012) FSL. *NeuroImage* 62(2):782–790.
40. Smith SM, et al. (2004) Advances in functional and structural MR image analysis and implementation as FSL. *NeuroImage* 23:S208–S219.
41. Woolrich MW, et al. (2009) Bayesian analysis of neuroimaging data in FSL. *NeuroImage* 45(1):S173–S186.
42. Prasloski T, Mädler B, Xiang QS, MacKay A, Jones C (2012) Applications of stimulated echo correction to multicomponent T2 analysis. *Magnetic resonance in medicine* 67(6):1803–14.
43. Whittall KP, MacKay AL (1989) Quantitative interpretation of NMR relaxation data. *Journal of Magnetic Resonance (1969)* 84(1):134–152.
44. Erickson SJ, Prost RW, Timins ME (1993) The 'magic angle' effect: Background physics and clinical relevance. *Radiology* 188(1):23–25.
45. Chappell KE, et al. (2004) Magic angle effects in MR neurography. *AJNR. American journal of neuroradiology* 25(3):431–40.
46. Henkelman RM, Stanisz GJ, Kim JK, Bronskill MJ (1994) Anisotropy of NMR properties of tissues. *Magnetic Resonance in Medicine* 32(5):592–601.
47. Kor D, et al. (2019) The role of iron and myelin in orientation dependent R2\* of white matter. *NMR in Biomedicine* p. e4092.
48. Birkel C, et al. (2016) Effects of formalin fixation and temperature on MR relaxation times in the human brain. *NMR in Biomedicine* 29(4):458–465.
49. Ethofer T, et al. (2003) Comparison of longitudinal metabolite relaxation times in different regions of the human brain at 1.5 and 3 Tesla. *Magnetic Resonance in Medicine* 50(6):1296–1301.
50. Stanisz GJ, et al. (2005) T1, T2 relaxation and magnetization transfer in tissue at 3T. *Magn Reson Med* 54(3):507–12.
51. Helms G, Hagberg GE (2009) In vivo quantification of the bound pool T1 in human white matter using the binary spin-bath model of progressive magnetization transfer saturation. *Physics in Medicine and Biology* 54(23):N529–N540.
52. Labadie C, et al. (2014) Myelin water mapping by spatially regularized longitudinal relaxographic imaging at high magnetic fields. *Magnetic Resonance in Medicine* 71(1):375–387.
53. Schyboff F, Jaekel U, Petruccione F, Neeb H (2019) Dipolar induced spin-lattice relaxation in the myelin sheath: A molecular dynamics study. *Scientific reports* 9(1):14813.
54. Hänninen N, Rautiainen J, Rieppo L, Saarakkala S, Nissi MJ (2017) Orientation anisotropy of quantitative MRI relaxation parameters in ordered tissue. *Scientific Reports* 7(1):1–11.
55. Yuan A, Rao MV, Veeranna, Nixon RA (2017) Neurofilaments and Neurofilament Proteins in Health and Disease. *Cold Spring Harbor perspectives in biology* 9(4):a018309.
56. Hernández-Torres E, et al. (2015) Orientation dependent mr signal decay differentiates between people with MS, their asymptomatic siblings and unrelated healthy controls. *PLoS ONE* 10(10):e0140956.
57. Birkel C, et al. (2019) The influence of brain iron on myelin water imaging. *NeuroImage* 199:545–552.
58. Liu H, et al. (2019) Myelin Water Atlas: A Template for Myelin Distribution in the Brain. *Journal of neuroimaging : official journal of the American Society of Neuroimaging* 29(6):699–706.
59. Liu H, et al. (2019) Myelin Water Fraction and Intra/Extracellular Water Geometric Mean T2 Normative Atlases for the Cervical Spinal Cord from 3T MRI. *Journal of neuroimaging : official journal of the American Society of Neuroimaging* p. jon.12659.
